# Supplementary material for: Boosting electrocatalytic N2 reduction by MnO2 with oxygen vacancies
Source: Royal Society of Chemistry journal article supplement (doi:10.1039/c9cc00936a), 2019-01-01
Supplement: c9cc00936a1.pdf [file c9cc00936a1.pdf]

## Electronic Supplementary Information

### Experimental

**Materials:** Condensed acetic acid ( $\text{CH}_3\text{COOH}$ ),  $\text{NaOH}$ ,  $\text{HCl}$ ,  $\text{Na}_2\text{SO}_4$ , and  $\text{C}_2\text{H}_5\text{OH}$  were purchased from Chengdu Kelong Chemical Reagent Factory. Manganese (II) acetate ( $\text{Mn}(\text{CH}_3\text{COO})_2$ ), potassium chlorate ( $\text{KClO}_3$ ), sodium salicylate ( $\text{C}_7\text{O}_3\text{H}_5\text{Na}$ ), sodium hypochlorite ( $\text{NaClO}$ ), sodium nitroferricyanide dihydrate ( $\text{C}_5\text{FeN}_6\text{Na}_2\text{O}\cdot 2\text{H}_2\text{O}$ ), para-(dimethylamino) benzaldehyde ( $p\text{-C}_9\text{H}_{11}\text{NO}$ ), and  $\text{N}_2\text{H}_4\cdot\text{H}_2\text{O}$  were purchased from Aladdin Ltd. (Shanghai, China). TM purchased from Hongshan District, Wuhan Instrument Surgical Instruments business. The water used throughout all experiments was purified through a Millipore system. All chemicals were used as received without further purification.

**Preparation of  $\text{MnO}_2$  NA/TM and  $\text{MnO}_x$  NA/TM:**  $\text{MnO}_2$  NA/TM was prepared as follows. 5 mL  $\text{CH}_3\text{COOH}$  was diluted into 70 mL aqueous solution. Then, 5 mmol  $\text{Mn}(\text{CH}_3\text{COO})_2$  and 8.75 mmol  $\text{KClO}_3$  were added to the above solution. Then the solution was transferred into a Teflon-lined stainless autoclave (100 mL), and a piece of TM was immersed into the autoclave contained solution. The autoclave was sealed and maintained at 160 °C for 12 h in an electric oven. After the autoclave cooled down naturally to room temperature, the resulting  $\text{MnO}_2$  NA/TM was taken out and washed with deionized water and  $\text{C}_2\text{H}_5\text{OH}$  several times alternatively, then dried in air at 60 °C for 6 h. To obtain  $\text{MnO}_x$  NA/TM,  $\text{MnO}_2$  NA/TM was then calcinated at 350 °C for 2 h with heating rate of 2 °C  $\text{min}^{-1}$  in Ar flow. The average loading for  $\text{MnO}_x$  on TM was determined to be 1.1  $\text{mg cm}^{-2}$ .

**Characterizations:** XRD patterns were obtained from a Shimadzu XRD-6100 diffractometer with Cu  $K\alpha$  radiation (40 kV, 30 mA) of wavelength 0.154 nm (Japan). SEM images were collected from the tungsten lamp-equipped SU3500 scanning electron microscope at an accelerating voltage of 20 kV (HITACHI, Japan). TEM images were obtained from a Zeiss Libra 200FE transmission electron microscope operated at 200 kV. XPS measurements were performed on an ESCALABMK II X-ray photoelectron spectrometer using Mg as the exciting source. The UV-Vis

absorbance spectra were measured on a SHIMADZU UV-1800 UV-Vis spectrophotometer. Raman spectra were collected on Renishaw with a 514.5 nm laser. A gas chromatograph (SHIMADZU, GC-2014C) equipped with MolSieve 5A column and Ar carrier gas was used for H<sub>2</sub> quantification. The temperature programmed deoxidation (O<sub>2</sub>-TPD) spectra were tested by TP-5076 TPD experimental device. Thermogravimetric (TG) curve were collected on a Perkin-Elmer Model Pyris1 TG analyzer at a heating rate of 10 °C min<sup>-1</sup> in flowing Ar. <sup>1</sup>H nuclear magnetic resonance (<sup>1</sup>H NMR) spectra were collected on a superconducting-magnet NMR spectrometer (Bruker AVANCE III HD 500 MHz) and dimethyl sulphoxide was used as an internal to calibrate the chemical shifts in the spectra.

**Electrochemical Measurements:** Before NRR tests, the Nafion proton exchange membrane was pretreated by heating in 3% H<sub>2</sub>O<sub>2</sub> solution, 0.5 M H<sub>2</sub>SO<sub>4</sub> and ultrapure water at 80 °C for 1 h, respectively. Electrochemical measurements were performed on a CHI 660E electrochemical analyzer (CHI Instruments, Inc., Shanghai) in a standard three-electrode system using MnO<sub>2</sub> NA/TM, MnO<sub>x</sub> NA/TM or TM as working electrode, Ag/AgCl as reference electrode, and graphite rod as counter electrode. All experiments were carried out at ambient conditions. For N<sub>2</sub> reduction experiments, the Na<sub>2</sub>SO<sub>4</sub> electrolyte (0.1 M) was bubbled with high-purity N<sub>2</sub> for 30 min before measurement. All potentials reported in this work were calibrated to RHE, using the following equation:

$$E \text{ (RHE)} = E \text{ (Ag/AgCl)} + (0.197 + 0.059 \text{ pH}) \text{ V}$$

**Determination of NH<sub>3</sub>:** NH<sub>3</sub> concentration was determined by the indophenol blue method.<sup>1</sup> In detail, 4 mL of post-NRR solution was removed from the cathodic chamber. Then, 50 μL oxidizing solution (NaClO (ρ<sub>Cl</sub>=4~4.9) and 0.75 M NaOH), 500 μL coloring solution (0.4 M C<sub>7</sub>H<sub>5</sub>O<sub>3</sub>Na and 0.32 M NaOH), and 50 μL catalyst solution (0.1 g Na<sub>2</sub>[Fe(CN)<sub>5</sub>NO]·2H<sub>2</sub>O diluted to 10 mL with deionized water) were added to the sample solution, sequentially. After standing the mixture solution at 25 °C for 1 h, UV-Vis absorption spectra were measured at a wavelength of 660 nm. The concentration-absorbance curve was calibrated using standard ammonia solutions with a series of concentrations. The fitting curve ( $y = 0.716x + 0.017$ ,  $R^2 = 0.999$ )

shows good linear relation of absorbance value with NH<sub>3</sub> concentration by three times independent calibrations.

**Determination of N<sub>2</sub>H<sub>4</sub>:** Concentration of N<sub>2</sub>H<sub>4</sub> in the electrolyte was estimated by the method of Watt and Chrisp.<sup>2</sup> In brief, a mixture solution containing p-C<sub>9</sub>H<sub>11</sub>NO (5.99 g), concentrated HCl (30 mL) and ethanol (300 mL) was used as a color reagent. In detail, 5 mL electrolyte removed from the cathodic chamber was added into 5 mL above prepared color reagent. After standing the mixture solution at 25 °C for 10 min, UV-Vis absorption spectra were measured at a wavelength of 455 nm. The concentration-absorbance curves were calibrated using standard N<sub>2</sub>H<sub>4</sub> solutions with a series of concentrations for three independent calibrations.

**Calculations of NH<sub>3</sub> yield rate and FE:** NH<sub>3</sub> yield was calculated using the following equations:

$$R_{\text{NH}_3} (\text{mol cm}^{-2} \text{ s}^{-1}) = (c_{\text{NH}_3} \times V) / (17 \times t \times A)$$

or

$$R_{\text{NH}_3} (\mu\text{g h}^{-1} \text{ mg}^{-1}_{\text{cat.}}) = (c_{\text{NH}_3} \times V) / (17 \times t \times m)$$

Where  $c_{\text{NH}_3}$  ( $\mu\text{g mL}^{-1}$ ) is the measured NH<sub>3</sub> concentration; V (mL) is the volume of electrolyte; t (s or h) is the reaction time; A ( $\text{cm}^2$ ) is the geometric area of the cathode; m (mg) is the mass loading of catalyst on TM.

FE was calculated according to following equation:

$$\text{FE} = 3 \times F \times c_{\text{NH}_3} \times V / (17 \times Q) \times 100\%$$

**Calculation of ECSA:** Electrochemical capacitance measurement was used to acquire the active surface area of MnO<sub>x</sub> NA/TM and MnO<sub>2</sub> NA/TM. The specific capacitance can be converted into an ECSA using the following equation:

$$A_{\text{ECSA}} = C_{dl} / 60 \mu\text{F cm}^{-2} \text{ per cm}^2_{\text{ECSA}}$$

**V<sub>O</sub> Determination:** First, the Mn<sup>x+</sup>/Mn<sup>4+</sup> ratio was calculated from peak areas. In general, the existence of low-valent Mn in MnO<sub>x</sub> indicates the oxygen vacancies will be generated to maintain electrostatic balance according to the following chemical equation:

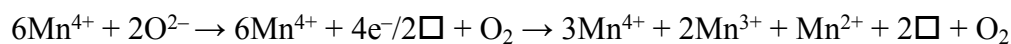

The  $\Box$  represents an empty position originating from the removal of O<sup>2-</sup> in the lattice.

It can be deduced that two oxygen vacancies generated accompanied with one  $\text{Mn}^{2+}$  and two  $\text{Mn}^{3+}$  ions from the equation.

**Computational details:** All DFT calculations were performed using the Vienna ab initio simulation package (VASP).<sup>3-5</sup> The exchange correlation is described by the Perdew, Burke, and Ernzerhof functional within the generalized gradient approximation (PBE-GGA).<sup>6</sup> The projector-augmented wave (PAW)<sup>7,8</sup> method is used to represent the core-valence electron interaction. The calculations are also conducted involving long-range dispersion interactions (DFT-D3 (BJ)). A Hubbard U term is added to the PBE functional (DFT+U), and a value of  $U_{\text{eff}} = 4.5$  eV is employed for Mn on its d orbital according to previous literatures.<sup>9,10</sup> Manganese 3d, 4s, nitrogen 2s, 2p, and oxygen 2s, 2p electrons are treated as valence electrons and an energy cutoff of 400 eV for basis-set expansion is used. The  $\text{MnO}_2$  (310) surface is modeled as a periodic slab with three trilayers, and the vacuum between slabs is 15 Å. A  $4 \times 1$  surface cell and the corresponding  $1 \times 1 \times 1$  k-point mesh are used in the calculations. The adsorption processes are modelled on one side of the slabs and during structural optimization, all of the atoms, except those in the bottom  $\text{MnO}_2$  trilayer of the slabs, are allowed to relax until atomic forces reached below  $0.05 \text{ eV \AA}^{-1}$ . Adsorption energies are calculated by the following equation:  $E_{\text{ads}} = - (E_{\text{total}} - E_{\text{surface}} - E_{\text{gas}})$  where  $E_{\text{total}}$ ,  $E_{\text{surface}}$  and  $E_{\text{gas}}$  are the calculated electronic energies of the adsorbed species on the surface, a clean surface and a gas phase molecule, respectively. The  $\Delta G$  value are calculated as follows:

$$\Delta G = \Delta E + \Delta \text{ZPE} - T\Delta S$$

where  $\Delta E$  is the difference of electronic energy,  $\Delta \text{ZPE}$  is the change in zero-point energies, T is the temperature ( $T = 298.15\text{K}$ ), and  $\Delta S$  is the change of entropy. The zero-point energies and entropies of the NRR species are calculated from the vibrational frequencies of adsorbed species. The entropies and vibrational frequencies of molecules in the gas phase are from the NIST database. [<http://cccbdb.nist.gov/>]

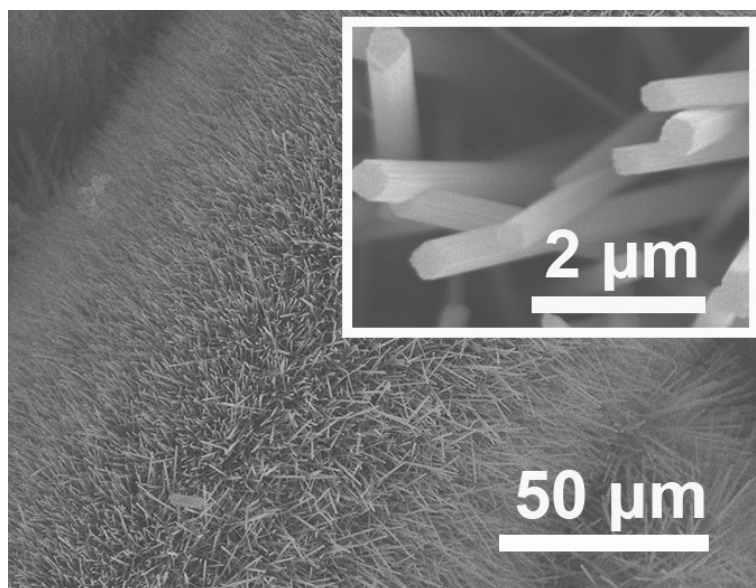

**Fig. S1.** SEM images of pristine MnO<sub>2</sub> NA/TM.

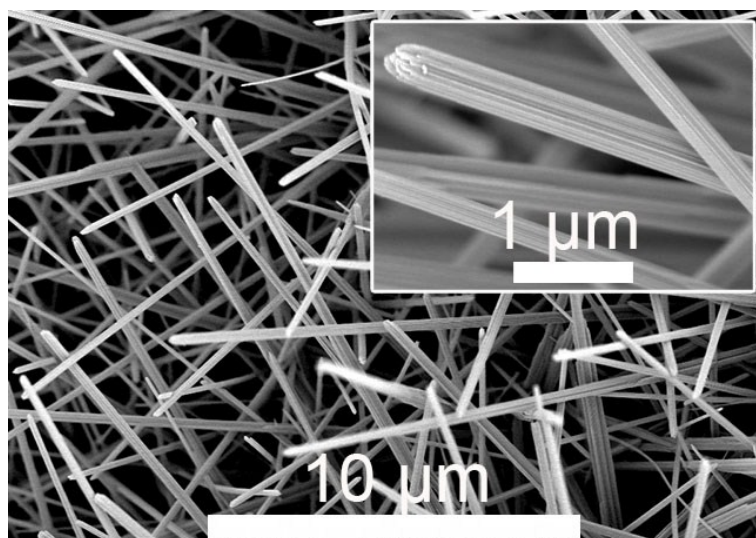

**Fig. S2.** Field-emission SEM images of pristine MnO<sub>x</sub> NA/TM.

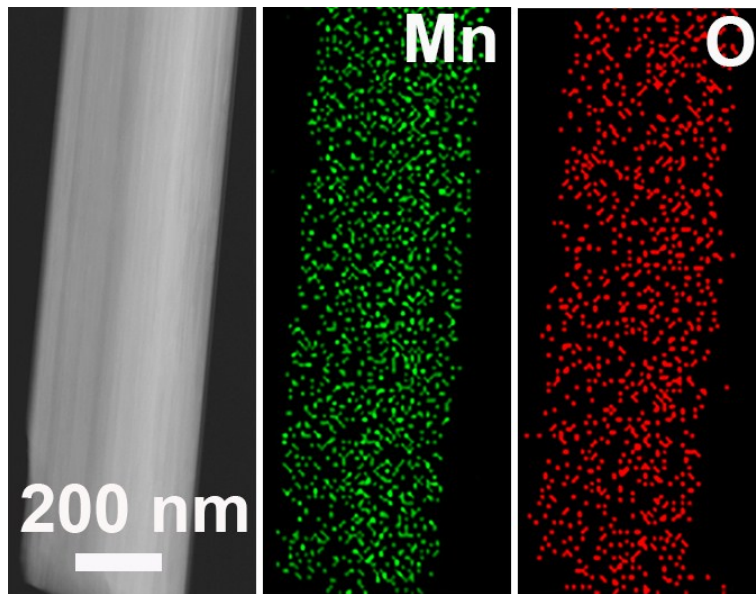

**Fig. S3.** STEM and corresponding energy-dispersive X-ray elemental mapping images for one single  $\text{MnO}_x$  nanowire.

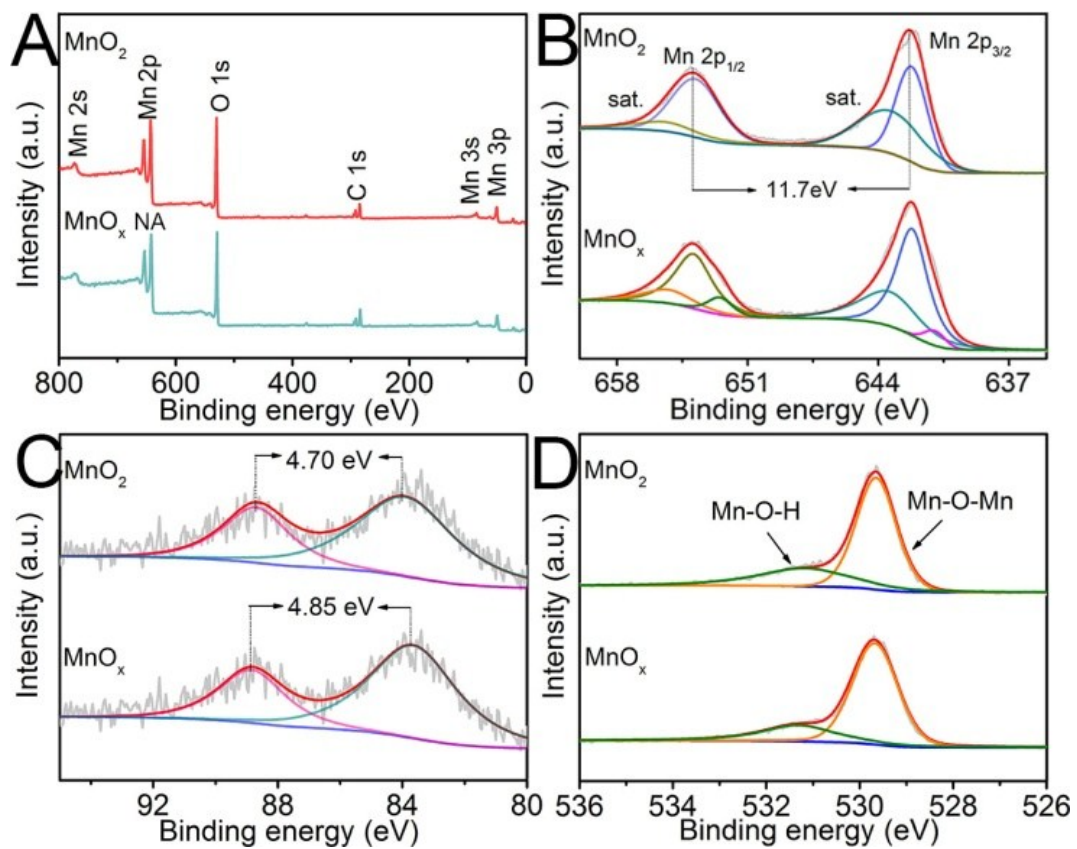

**Fig. S4.** (A) XPS survey spectra of  $\text{MnO}_2$  and  $\text{MnO}_x$ . XPS spectra in (B) Mn 2p, (C) Mn 3s, and (D) O 1s regions.



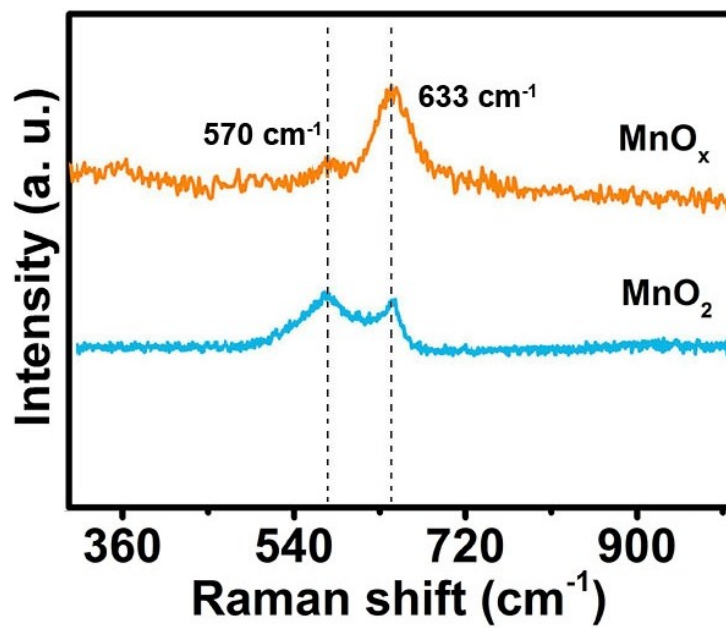

Fig. S5. Raman shift spectra of MnO<sub>2</sub> and MnO<sub>x</sub>.

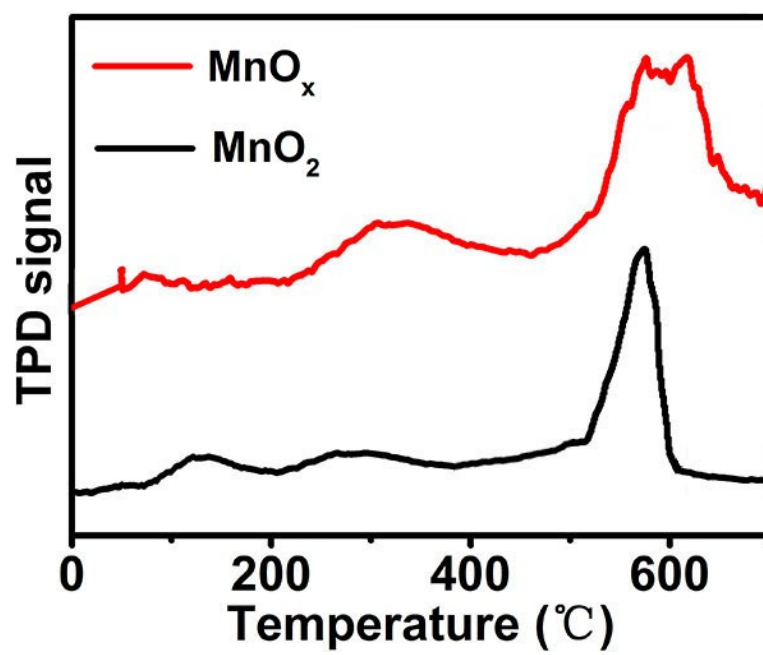

Fig. S6. O<sub>2</sub>-TPD profiles of MnO<sub>2</sub> and MnO<sub>x</sub>.

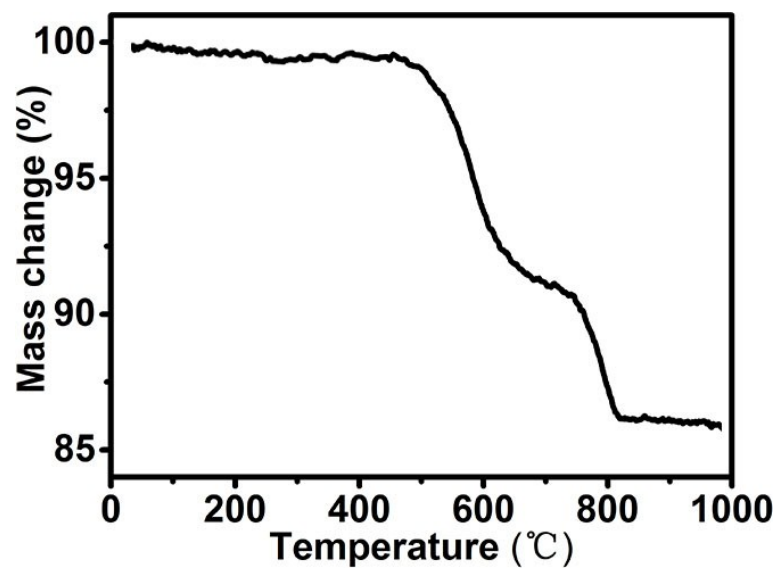

Fig. S7. TG curve of MnO<sub>x</sub>.

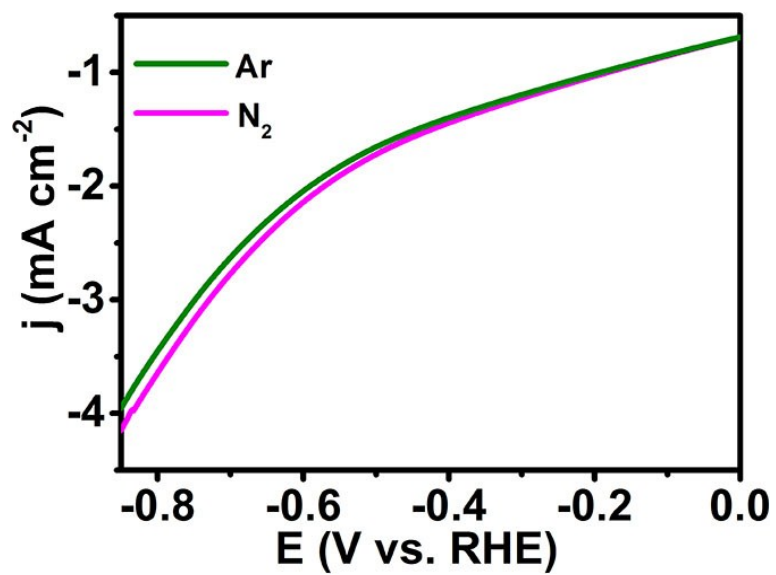

**Fig. S8.** Linear scan voltammetry curves of  $\text{MnO}_x$  NA/TM in Ar- and  $\text{N}_2$ -saturated 0.1 M  $\text{Na}_2\text{SO}_4$ .

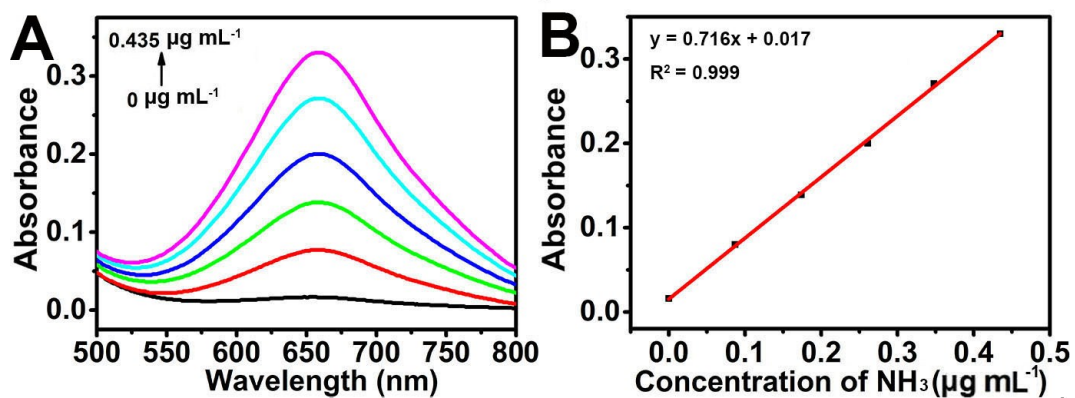

**Fig. S9.** (A) UV-Vis absorption spectra of indophenol assays with  $\text{NH}_3$  in 0.1 M  $\text{Na}_2\text{SO}_4$  after incubated for 1 hour at room temperature and (B) calibration curve used for estimation of  $\text{NH}_3$ .

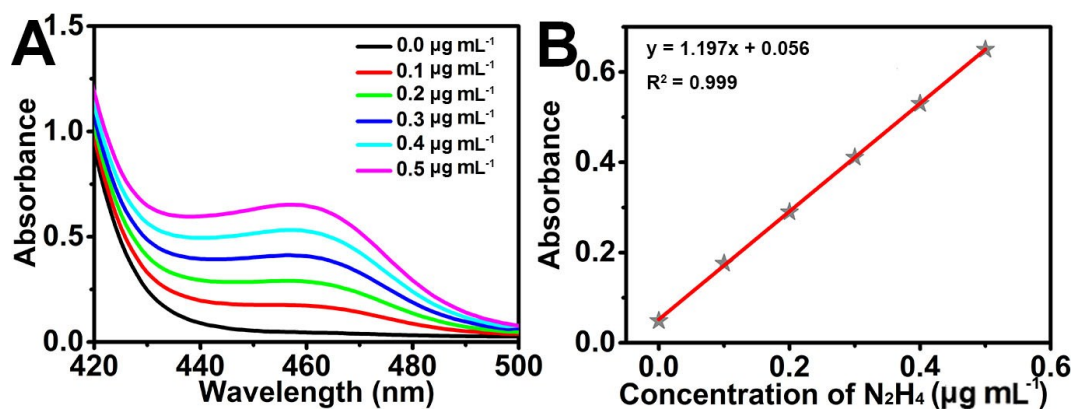

**Fig. S10.** (A) UV-Vis absorption spectra of various  $N_2H_4$  concentration after incubated for 10 min at room temperature. (B) Calibration curve used for estimation of  $N_2H_4$  concentration.

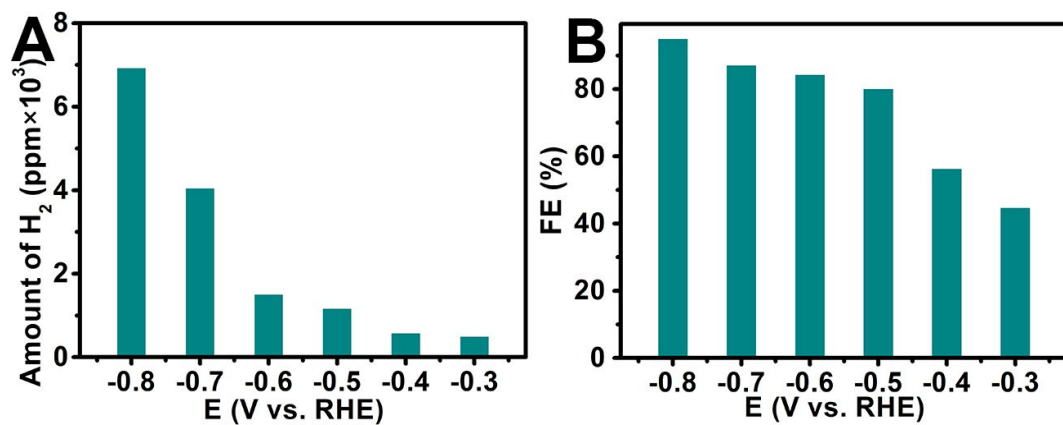

**Fig. S11.** (A) The amount of produced H<sub>2</sub> at each given potential. (B) The corresponding FE of H<sub>2</sub> at each given potential.

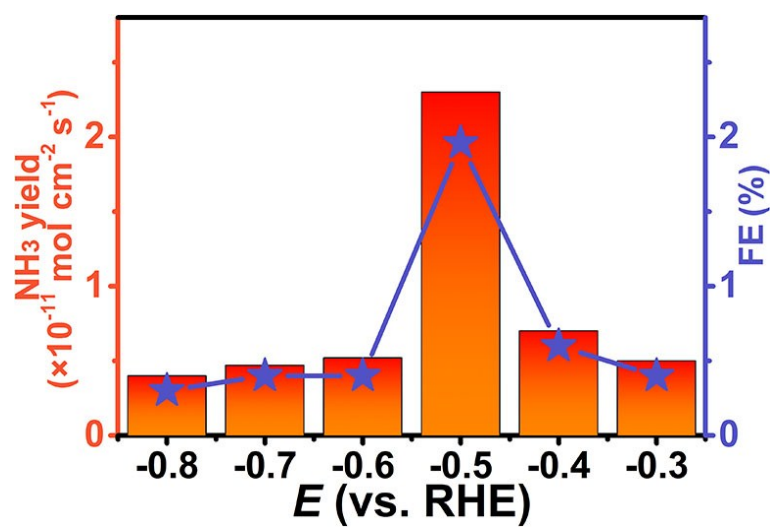

**Fig. S12.**  $\text{NH}_3$  yields and FEs for pristine  $\text{MnO}_2$  NA/TM at a series of potentials for 2 h electrolysis under ambient conditions.



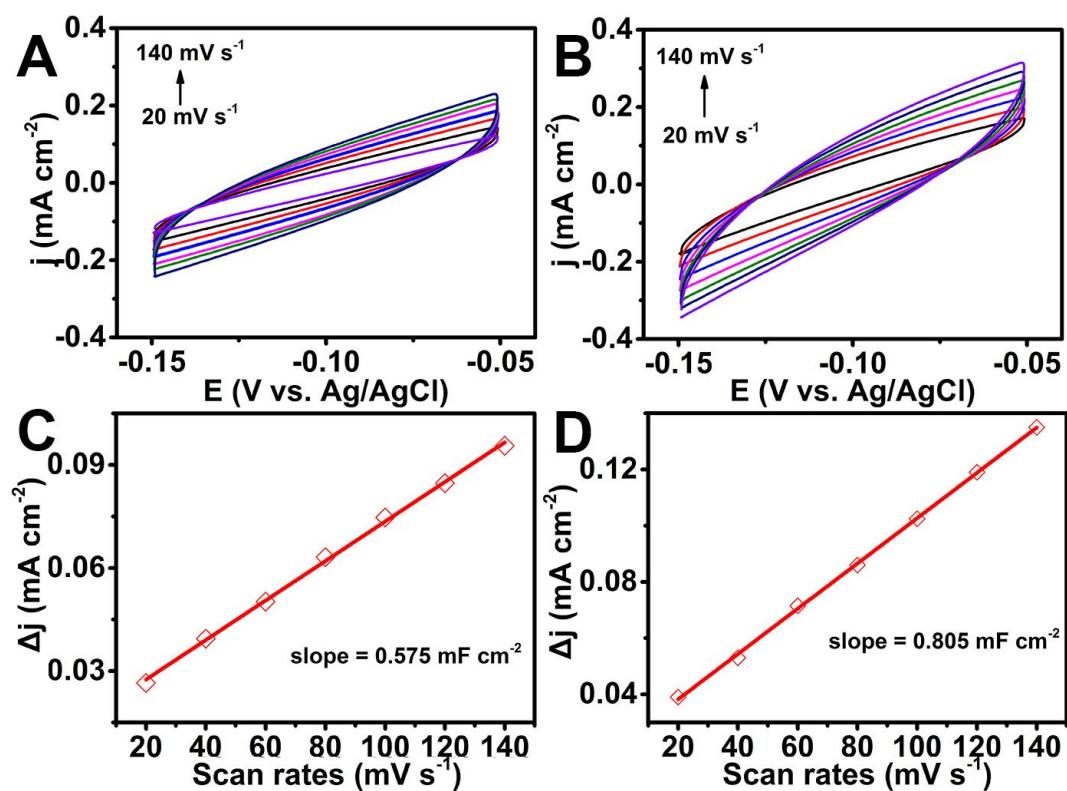

**Fig. S13.** Cyclic voltammograms for (A)  $\text{MnO}_2$  NA/TM and (B)  $\text{MnO}_x$  NA/TM in the non-faradaic capacitance current range at scan rates of 20, 40, 60, 80, 100, 120, and 140  $\text{mV s}^{-1}$ . The capacitive currents at  $-0.10$  V vs. Ag/AgCl as a function of scan rate for (C)  $\text{MnO}_2$  NA/TM and (D)  $\text{MnO}_x$  NA/TM.

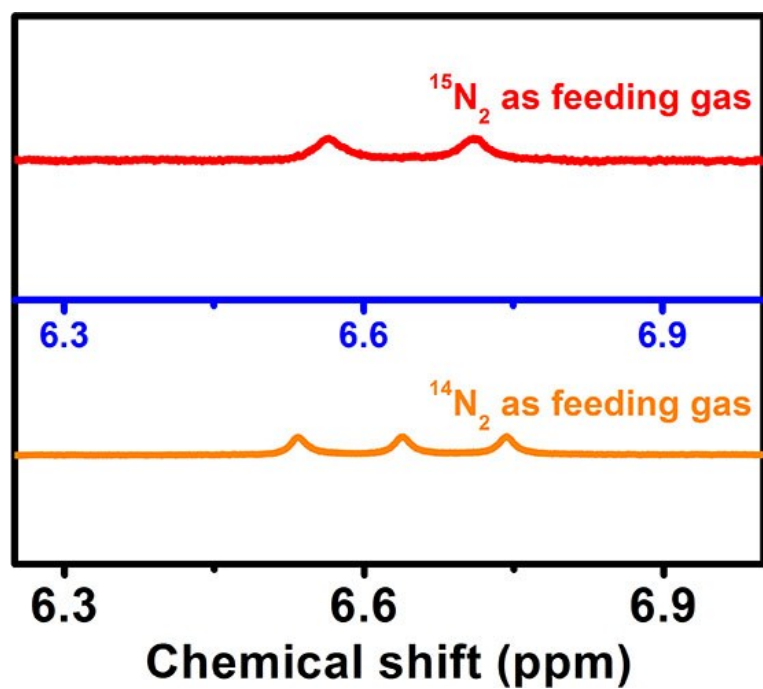

**Fig. S14.**  $^{15}\text{N}$  isotope labeling experiment.  $^1\text{H}$  NMR spectra for the post-electrolysis 0.1 M  $\text{Na}_2\text{SO}_4$  electrolytes with  $^{15}\text{N}_2$  and  $^{14}\text{N}_2$  as feeding gas.

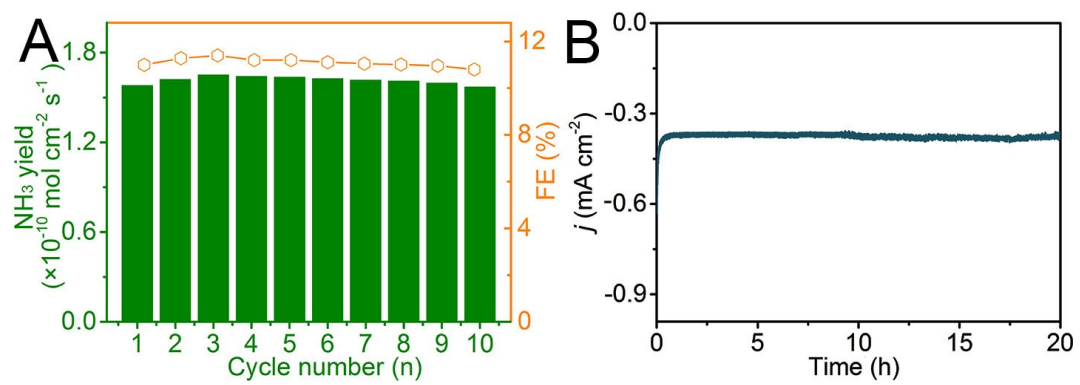

**Fig. S15.** (A) Cycling test of MnO<sub>x</sub> NA/TM at -0.5 V vs. RHE. (B) *i-t* curve of MnO<sub>x</sub> NA/TM for NRR at -0.5 V vs. RHE for 20 h.

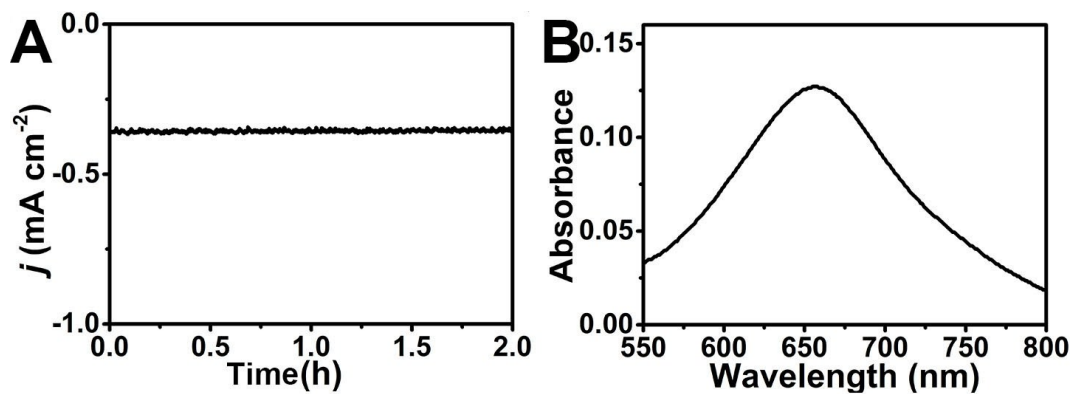

**Fig. S16.** (A) Chronoamperometric curve of MnO<sub>x</sub> NA/TM after long-term electrolysis at -0.5 V. (B) UV-Vis absorption spectrum of corresponding electrolyte.

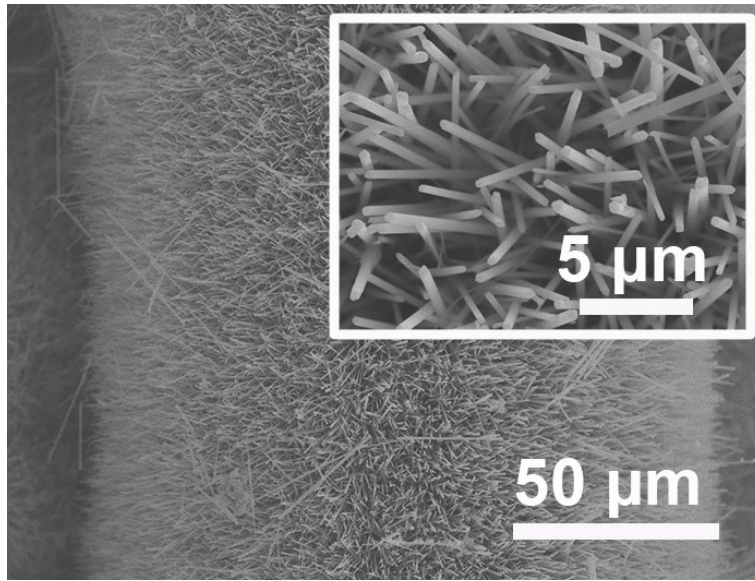

**Fig. S17.** SEM images of MnO<sub>x</sub> NA/TM after stability test.

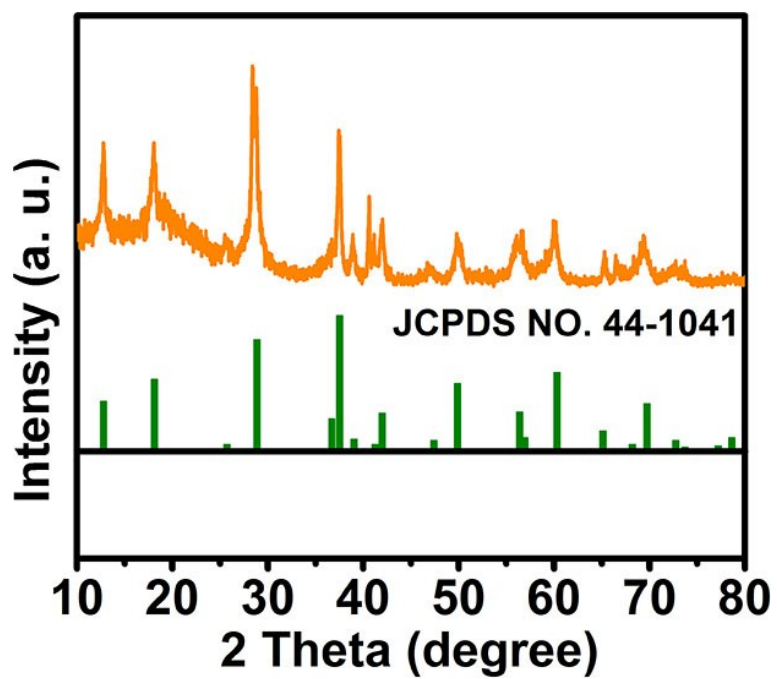

Fig. S18. XRD pattern of  $\text{MnO}_x$  after stability test.

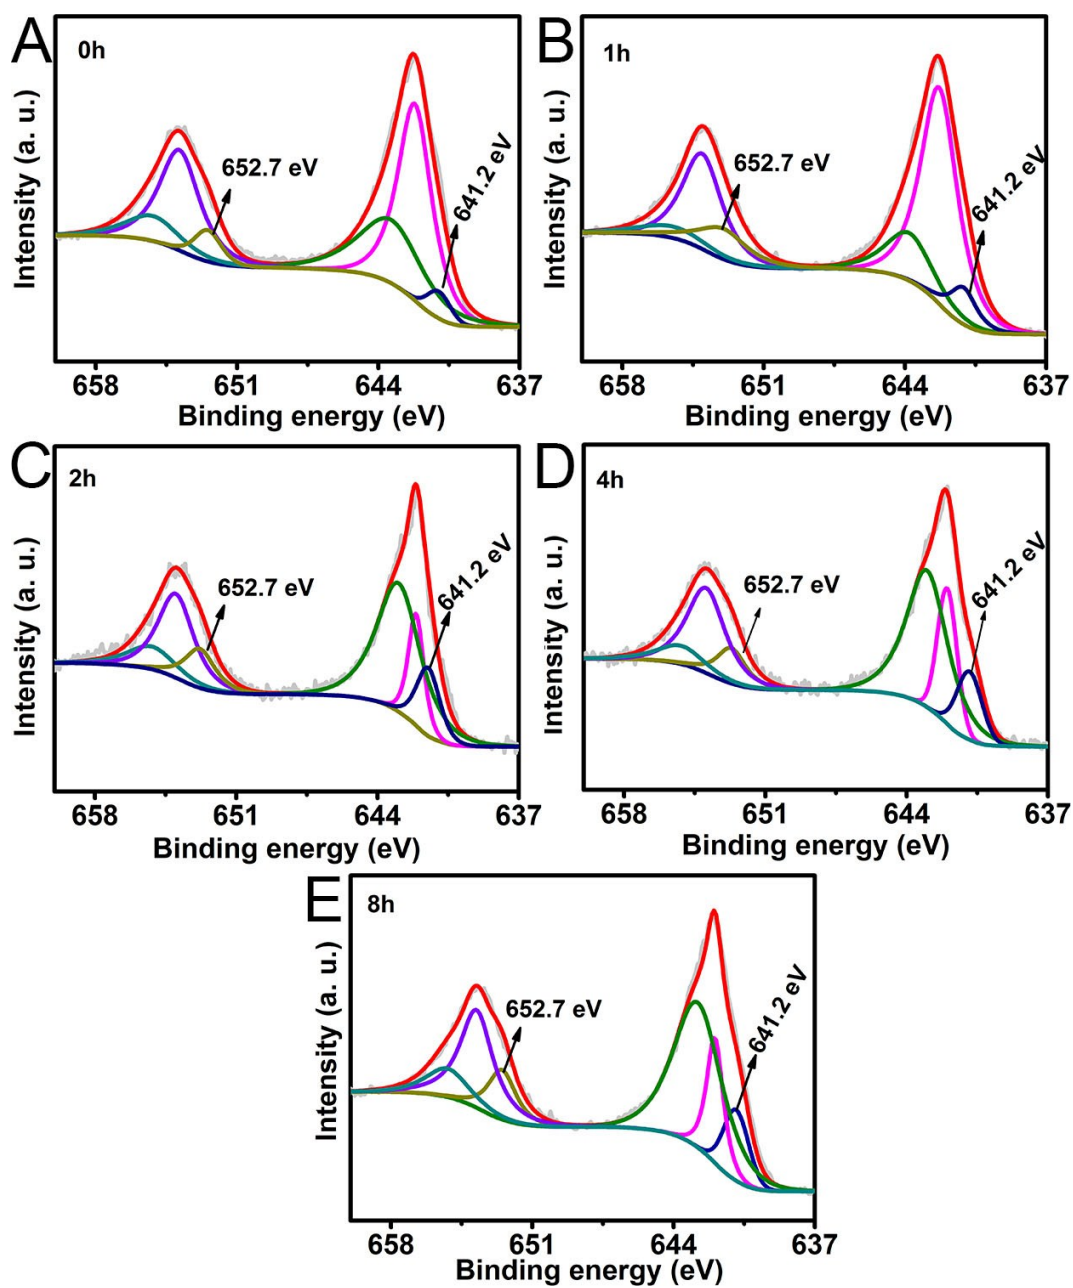

**Fig. S19.** XPS spectra of MnO<sub>x</sub> in Mn 2p region before and after electrolysis at  $-0.5$  V for different time.

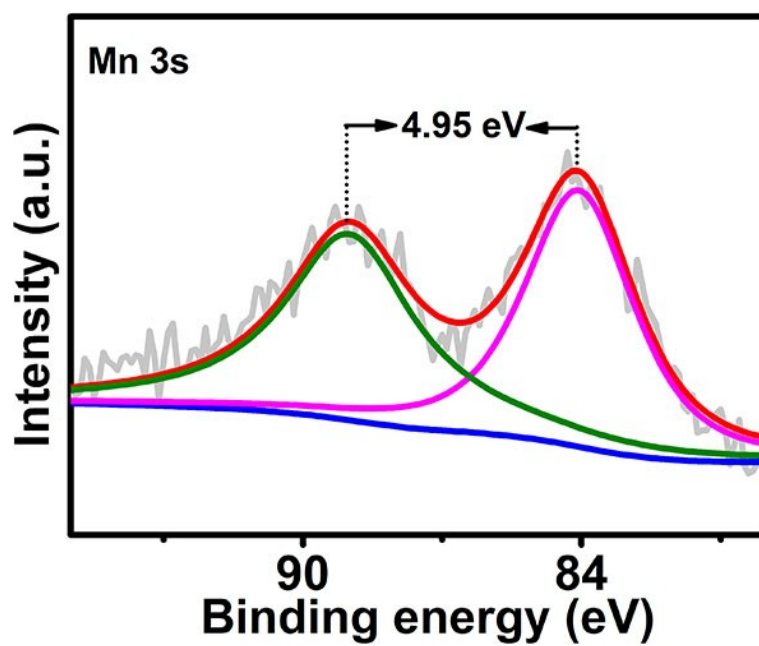

**Fig. S20.** XPS spectrum of  $\text{MnO}_x$  in Mn 3s region after stability test at  $-0.5$  V.



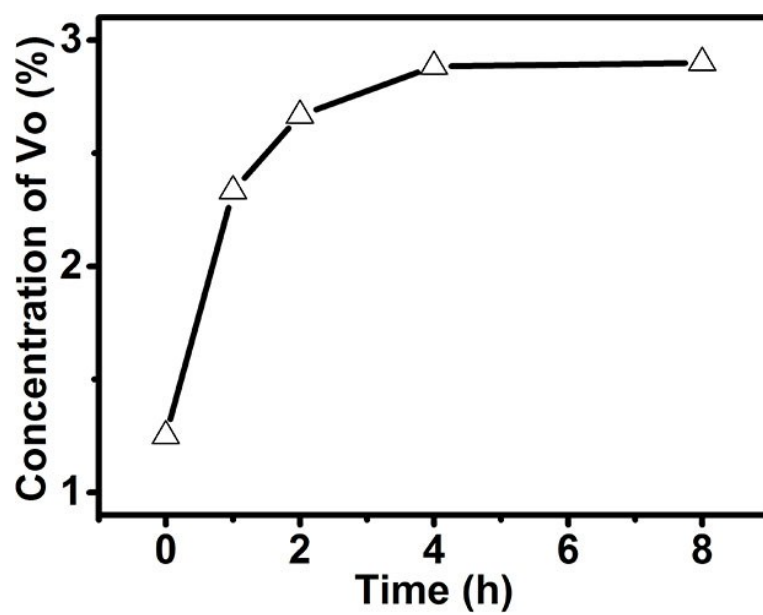

**Fig. S21.** Concentrations of V<sub>O</sub> in MnO<sub>x</sub> after electrolysis for different time at – 0.5 V.

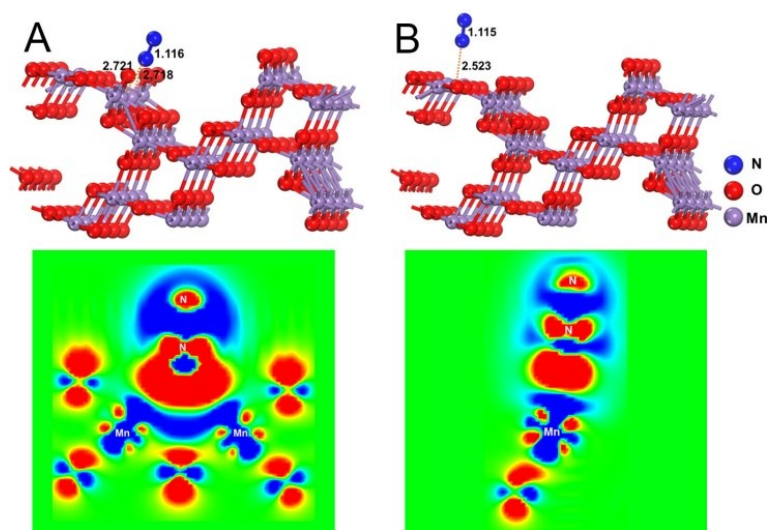

**Fig. S22.** Optimized structures and charge density difference of the  $\text{N}_2$  adsorption on the  $\text{MnO}_2$  (310) surfaces with (A) and without (B)  $\text{V}_\text{O}$ . Selected bond lengths ( $\text{\AA}$ ) are also given. Red and blue isosurfaces (0.001 a.u.) represent charge accumulation and depletion, respectively.

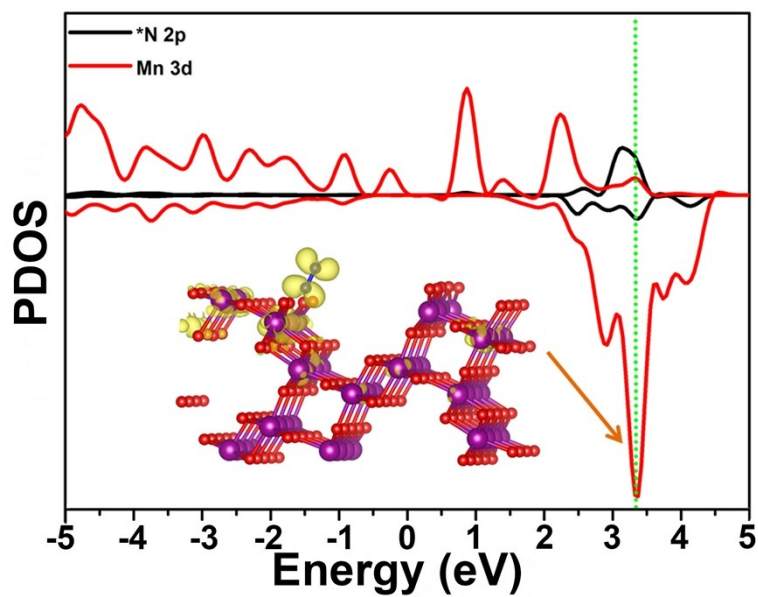

**Fig. S23.** PDOS profiles of N<sub>2</sub> adsorption on the MnO<sub>2</sub> (310) surface with one oxygen vacancy. In the end-on adsorption configuration, two Mn<sub>6c</sub> atoms near the oxygen vacancy interact with N<sub>2</sub>. The overlap between 3d of the two Mn<sub>6c</sub> atoms and 2p of the adsorbed \*N atom confirms the interaction between N<sub>2</sub> and MnO<sub>2</sub> surface (Charge density is inserted).

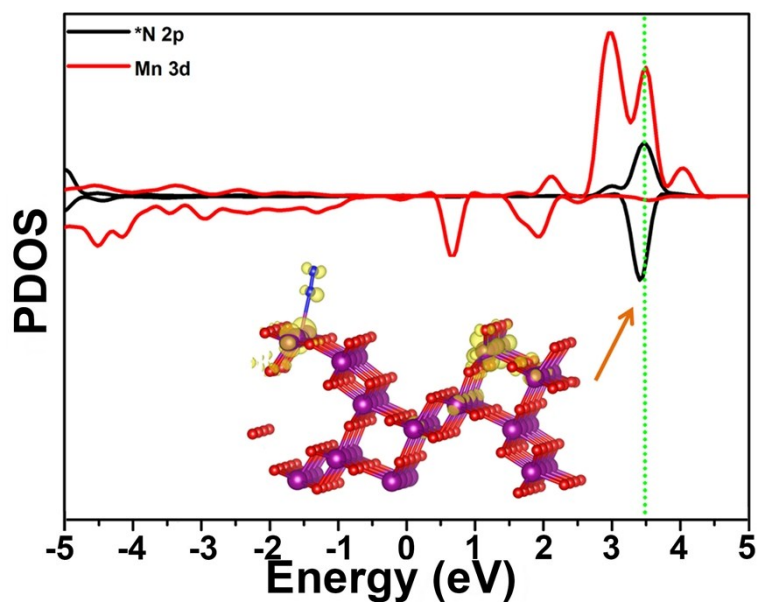

**Fig. S24.** PDOS profiles of  $\text{N}_2$  adsorption on the pristine  $\text{MnO}_2$  (310) surface. The exposed  $\text{Mn}_{5c}$  atom interacts with  $\text{N}_2$ . The overlap between 3d of the  $\text{Mn}_{5c}$  atom and 2p of the adsorbed \*N atom confirms the interaction between  $\text{N}_2$  and  $\text{MnO}_2$  surface. (Charge density is inserted).

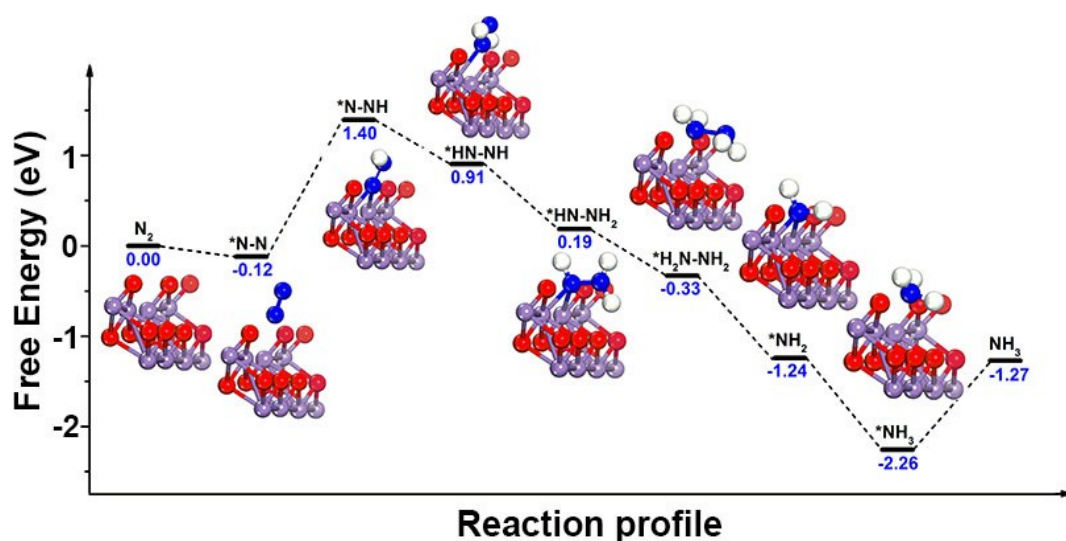

**Fig. S25.** DFT computed energy profile for the electrocatalytic NRR on the  $MnO_2$  (310) surface with an oxygen vacancy.

One computed favorable energy profile for the NRR on the  $MnO_2$  (310) surface with an oxygen vacancy is shown in Fig. S18. The  $N_2$  adsorption energy is predicted to be 0.54 eV (free energy: 0.12 eV). After  $N_2$  adsorption, six consecutive proton and electron transfer processes are involved along the alternative reaction pathway. Firstly, a hydrogen attacks the distal  $*N$  atom and forms the  $*N-NH$  species. Then, a second hydrogen attaches to the proximal N and generates the  $*HN-NH$  species. The following hydrogenation reactions alternately occur between these two N atoms resulting in two  $NH_3$  molecules. The free energy changes along this reaction pathway are totally downhill except the reaction step from  $*N-N$  to  $*N-NH$ , which has a free energy barrier of 1.52 eV. It will be reduced to 1.02 eV with an external potential of -0.5 V vs. RHE.

**Table S1.** Comparison of the NRR performances for MnO<sub>x</sub> NA/TM with reported NRR electrocatalysts under ambient conditions.

| Catalyst                                                         | Electrolyte                               | NH <sub>3</sub> yield                                             | FE (%)       | Ref.             |
|------------------------------------------------------------------|-------------------------------------------|-------------------------------------------------------------------|--------------|------------------|
| <b>MnO<sub>x</sub> NA/TM</b>                                     | <b>0.1 M Na<sub>2</sub>SO<sub>4</sub></b> | <b>1.63 × 10<sup>-10</sup> mol cm<sup>-2</sup> s<sup>-1</sup></b> | <b>11.40</b> | <b>This work</b> |
| Fe <sub>2</sub> O <sub>3</sub> -CNT                              | diluted KHCO <sub>3</sub>                 | 3.59 × 10 <sup>-12</sup> mol cm <sup>-2</sup> s <sup>-1</sup>     | 0.15         | 1                |
| SnO <sub>2</sub>                                                 | 0.1 M Na <sub>2</sub> SO <sub>4</sub>     | 1.47 × 10 <sup>-10</sup> mol cm <sup>-2</sup> s <sup>-1</sup>     | 2.17         | 11               |
| MoS <sub>2</sub> /CC                                             | 0.1 M Na <sub>2</sub> SO <sub>4</sub>     | 8.08 × 10 <sup>-11</sup> mol cm <sup>-2</sup> s <sup>-1</sup>     | 1.17         | 12               |
| Fe <sub>3</sub> O <sub>4</sub> /Ti                               | 0.1 M Na <sub>2</sub> SO <sub>4</sub>     | 5.6 × 10 <sup>-11</sup> mol cm <sup>-2</sup> s <sup>-1</sup>      | 2.6          | 13               |
| TiO <sub>2</sub>                                                 | 0.1 M Na <sub>2</sub> SO <sub>4</sub>     | 9.16 × 10 <sup>-11</sup> mol cm <sup>-2</sup> s <sup>-1</sup>     | 2.5          | 14               |
| TiO <sub>2</sub> -rGO                                            | 0.1 M Na <sub>2</sub> SO <sub>4</sub>     | 15.13 μg h <sup>-1</sup> mg <sup>-1</sup> <sub>cat.</sub>         | 3.3          | 15               |
| defect-rich MoS <sub>2</sub> nanoflower                          | 0.1 M Na <sub>2</sub> SO <sub>4</sub>     | 29.28 μg h <sup>-1</sup> mg <sup>-1</sup> <sub>cat.</sub>         | 8.34         | 16               |
| Hollow Cr <sub>2</sub> O <sub>3</sub> microspheres               | 0.1 M Na <sub>2</sub> SO <sub>4</sub>     | 25.3 μg h <sup>-1</sup> mg <sup>-1</sup> <sub>cat.</sub>          | 6.78         | 17               |
| AuHNCs                                                           | 0.5 M LiClO <sub>4</sub>                  | 6.37 × 10 <sup>-11</sup> mol cm <sup>-2</sup> s <sup>-1</sup>     | 30.2         | 18               |
| N-doped C nanospikes                                             | 0.25 M LiClO <sub>4</sub>                 | 1.59 × 10 <sup>-9</sup> mol cm <sup>-2</sup> s <sup>-1</sup>      | 11.56        | 19               |
| β-FeOOH nanorod                                                  | 0.5 M Li <sub>2</sub> SO <sub>4</sub>     | 23.32 μg h <sup>-1</sup> mg <sup>-1</sup> <sub>cat.</sub>         | 6.7          | 20               |
| Pd/C                                                             | 0.1 M PBS                                 | 4.5 μg h <sup>-1</sup> mg <sup>-1</sup> <sub>cat.</sub>           | 8.2          | 21               |
| Fe/Fe <sub>3</sub> O <sub>4</sub>                                | 0.1 M PBS                                 | 3.06 × 10 <sup>-12</sup> mol cm <sup>-2</sup> s <sup>-1</sup>     | 8.29         | 22               |
| Mo nanofilm                                                      | 0.01 M H <sub>2</sub> SO <sub>4</sub>     | 3.09 × 10 <sup>-11</sup> mol cm <sup>-2</sup> s <sup>-1</sup>     | 0.72         | 23               |
| BG                                                               | 0.05 M H <sub>2</sub> SO <sub>4</sub>     | 1.6 × 10 <sup>-10</sup> mol cm <sup>-2</sup> s <sup>-1</sup>      | 10.8         | 24               |
| Ti <sub>3</sub> C <sub>2</sub> T <sub>x</sub> nanosheet          | 0.1 M HCl                                 | 20.4 μg h <sup>-1</sup> mg <sub>cat.</sub> <sup>-1</sup>          | 9.3          | 25               |
| NPC                                                              | 0.05 M H <sub>2</sub> SO <sub>4</sub>     | 23.80 μg h <sup>-1</sup> mg <sup>-1</sup> <sub>cat.</sub>         | 1.42         | 26               |
| TA-reduced Au/TiO <sub>2</sub>                                   | 0.1 M HCl                                 | 21.40 μg h <sup>-1</sup> mg <sup>-1</sup> <sub>cat.</sub>         | 8.11         | 27               |
| Bi <sub>4</sub> V <sub>2</sub> O <sub>11</sub> /CeO <sub>2</sub> | 0.1 M HCl                                 | 23.21 μg h <sup>-1</sup> mg <sup>-1</sup> <sub>cat.</sub>         | 10.16        | 28               |
| MoO <sub>3</sub>                                                 | 0.1 M HCl                                 | 29.43 μg h <sup>-1</sup> mg <sup>-1</sup> <sub>cat.</sub>         | 1.9          | 29               |
| Mo <sub>2</sub> N                                                | 0.1 M HCl                                 | 78.4 μg h <sup>-1</sup> mg <sup>-1</sup> <sub>cat.</sub>          | 4.5          | 30               |
| MoN NA/CC                                                        | 0.1 M HCl                                 | 3.01 × 10 <sup>-10</sup> mol cm <sup>-2</sup> s <sup>-1</sup>     | 1.15         | 31               |
| NCM-Au NPs                                                       | 0.1 M HCl                                 | 5.9 × 10 <sup>-10</sup> mol cm <sup>-2</sup> s <sup>-1</sup>      | 22           | 32               |
| Nb <sub>2</sub> O <sub>5</sub> nanofiber                         | 0.1 M HCl                                 | 43.6 μg h <sup>-1</sup> mg <sup>-1</sup> <sub>cat.</sub>          | 9.26         | 33               |
| PCN                                                              | 0.1 M HCl                                 | 8.09 μg h <sup>-1</sup> mg <sup>-1</sup> <sub>cat.</sub>          | 11.59        | 34               |
| B <sub>4</sub> C                                                 | 0.1 M HCl                                 | 26.57 μg h <sup>-1</sup> mg <sup>-1</sup> <sub>cat.</sub>         | 15.95        | 35               |
| Ag nanosheet                                                     | 0.1 M HCl                                 | 4.62 × 10 <sup>-11</sup> mol cm <sup>-2</sup> s <sup>-1</sup>     | 4.8          | 36               |
| ZIF-derived carbon                                               | 0.1 M KOH                                 | 9.44 × 10 <sup>-10</sup> mol cm <sup>-2</sup> s <sup>-1</sup>     | 10.20        | 37               |

## References

- 1 S. Chen, S. Perathoner, C. Ampelli, C. Mebrahtu, D. Su and G. Centi, *Angew. Chem., Int. Ed.*, 2017, **56**, 2699–2703.
- 2 G. W. Watt and J. D. Chrisp, *Anal. Chem.*, 1952, **24**, 2006–2008.
- 3 G. Kresse and J. Furthmüller, *Comput. Mater. Sci.*, 1996, **6**, 15–50.
- 4 G. Kresse and J. Furthmüller, *Phys. Rev. B*, 1996, **54**, 11169–11186.
- 5 Z. Fan, Z. Wang, J.-W. Shi, C. Gao, G. Gao, B. Wang, Y. Wang, X. Chen, C. He and C. Niu, *J. Catal.* 2019, **370**, 30–37.
- 6 J. P. Perdew, K. Burke and M. Ernzerhof, *Phys. Rev. Lett.*, 1996, **77**, 3865–3868.
- 7 G. Kresse and D. Joubert, *Phys. Rev. B*, 1999, **59**, 1758–1775.
- 8 P. E. Blöchl, *Phys. Rev. B*, 1994, **50**, 17953–17979.
- 9 C. R. Podloucky, J. Paier, M. Marsman and G. Kresse, *Phys. Rev. B*, 2007, **75**, 195128.
- 10 G. Trimarchi and N. Binggeli, *Phys. Rev. B*, 2005, **71**, 035101.
- 11 L. Zhang, X. Ren, Y. Luo, X. Shi, A. M. Asiri, T. Li and X. Sun, *Chem. Commun.*, 2018, **54**, 12966–12969.
- 12 L. Zhang, X. Ji, X. Ren, Y. Ma, X. Shi, Z. Tian, A. M. Asiri, L. Chen, B. Tang and X. Sun, *Adv. Mater.*, 2018, **30**, 1800191.
- 13 Q. Liu, X. Zhang, B. Zhang, Y. Luo, G. Cui, F. Xie and X. Sun, *Nanoscale*, 2018, **10**, 14386–14389.
- 14 R. Zhang, X. Ren, X. Shi, F. Xie, B. Zheng, X. Guo and X. Sun, *ACS Appl. Mater. Interfaces*, 2018, **10**, 28251–28255.
- 15 X. Zhang, Q. Liu, X. Shi, A. M. Asiri, Y. Luo, X. Sun and T. Li, *J. Mater. Chem. A*, 2018, **6**, 17303–17306.
- 16 X. Li, T. Li, Y. Ma, Q. Wei, W. Qiu, H. Guo, X. Shi, P. Zhang, A. M. Asiri, L. Chen, B. Tang and X. Sun, *Adv. Energy Mater.*, 2018, **8**, 1801357.

- 17 Y. Zhang, W. Qiu, Y. Ma, Y. Luo, Z. Tian, G. Cui, F. Xie, L. Chen, T. Li and X. Sun, *ACS Catal.*, 2018, **8**, 8540–8544.
- 18 M. Nazemi, S. R. Panikkanval and M. A. El-Sayed, *Nano Energy*, 2018, **49**, 316–323.
- 19 Y. Song, D. Johnson, R. Peng, D. K. Hensley, P. V. Bonnesen, L. Liang, J. Huang, F. Yang, F. Zhang, R. Qiao, A. P. Baddorf, T. J. Tschaplinski, N. L. Engle, M. C. Hatzell, Z. Wu, D. A. Cullen, H. M. Meyer III, B. G. Sumpter and A. J. Rondinone, *Sci. Adv.*, 2018, **4**, e1700336.
- 20 X. Zhu, Z. Liu, Q. Liu, Y. Luo, X. Shi, A. M. Asiri, Y. Wu and X. Sun, *Chem. Commun.*, 2018, **54**, 11332–11335.
- 21 J. Wang, Y. Liang, L. Hu, G. Chen, H. Xin and X. Feng, *Nat. Commun.*, 2018, **9**, 1795.
- 22 L. Hu, A. Khaniya, J. Wang, G. Chen, W. E. Kaden and X. Feng, *ACS Catal.*, 2018, **8**, 9312–9319.
- 23 D. Yang, T. Chen and Z. Wang, *J. Mater. Chem. A*, 2017, **5**, 18967–18971.
- 24 X. Yu, P. Han, Z. Wei, L. Huang, Z. Gu, S. Peng, J. Ma and G. Zheng, *Joule*, 2018, **2**, 1610–1622.
- 25 J. Zhao, L. Zhang, X.-Y. Xie, X. Li, Y. Ma, Q. Liu, W.-H. Fang, X. Shi, G. Cui and X. Sun, *J. Mater. Chem. A*, 2018, **6**, 24031–24035.
- 26 Y. Liu, Y. Su, X. Quan, X. Fan, S. Chen, H. Yu, H. Zhao, Y. Zhang and J. Zhao, *ACS Catal.*, 2018, **8**, 1186–1191.
- 27 M. Shi, D. Bao, B. Wulan, Y. Li, Y. Zhang, J. Yan and Q. Jiang, *Adv. Mater.*, 2017, **29**, 1606550.
- 28 C. Lv, C. Yan, G. Chen, Y. Ding, J. Sun, Y. Zhou and G. Yu, *Angew. Chem., Int. Ed.*, 2018, **57**, 6073–6076.
- 29 J. Han, X. Ji, X. Ren, G. Cui, L. Li, F. Xie, H. Wang, B. Li and X. Sun, *J. Mater. Chem. A*, 2018, **6**, 12974–12977.
- 30 X. Ren, G. Cui, L. Chen, F. Xie, Q. Wei, Z. Tian and X. Sun, *Chem. Commun.*, 2018, **54**, 8474–8477.
- 31 L. Zhang, X. Ji, X. Ren, Y. Luo, X. Shi, A. M. Asiri, B. Zheng and X. Sun,



- ACS Sustainable Chem. Eng.*, 2018, **6**, 9550–9554.
- 32 H. Wang, L. Wang, Q. Wang, S. Ye, W. Sun, Y. Shao, Z. Jiang, Q. Qiao, Y. Zhu, P. Song, D. Li, L. He, X. Zhang, J. Yuan, T. Wu and G. A.O. zin, *Angew. Chem., Int. Ed.*, 2018, **57**, 12360–12364.
- 33 J. Han, Z. Liu, Y. Ma, G. Cui, F. Xie, F. Wang, Y. Wu, S. Gao, Y. Xu and X. Sun, *Nano Energy*, 2018, **52**, 264–270.
- 34 C. Lv, Y. Qian, C. Yan, Y. Ding, Y. Liu, G. Chen and G. Yu, *Angew. Chem., Int. Ed.*, 2018, **57**, 10246–10250.
- 35 W. Qiu, X. Xie, J. Qiu, W. Fang, R. Liang, X. Ren, X. Ji, G. Cui, A. M. Asiri, G. Cui, B. Tang and X. Sun, *Nat. Commun.*, 2018, **9**, 3485.
- 36 H. Huang, L. Xia, X. Shi, A. M. Asiri and X. Sun, *Chem. Commun.*, 2018, **54**, 11427–11430.
- 37 S. Mukherjee, D. A. Cullen, S. Karakalos, K. Liu, H. Zhang, S. Zhao, H. Xu, K. L. More, G. Wang and G. Wu, *Nano Energy*, 2018, **48**, 217–226.
